# Supplementary material for: Large area growth of SnS2/graphene on cellulose paper as a flexible broadband photodetector and investigating its band structure through first principles calculations
Source: Royal Society of Chemistry journal article supplement (doi:10.1039/d1ma00054c), 2021-01-01
Supplement: d1ma00054c1.pdf [file d1ma00054c1.pdf]

## Supporting Information

# Large area growth of SnS<sub>2</sub>/Graphene on cellulose paper as a flexible broadband photodetector and investigating the band structure through First Principle Calculations

Venkatarao Selamneni<sup>1</sup>, Sayan Kanungo<sup>1</sup>, and Parikshit Sahatiya<sup>1\*</sup>

<sup>1</sup>Department of Electrical and Electronics Engineering, Birla Institute of Technology and Science Pilani Hyderabad Campus, Hyderabad 500078, India

\*Corresponding author: E-mail: parikshit@hyderabad.bits-pilani.ac.in; Telephone: 040-66303617

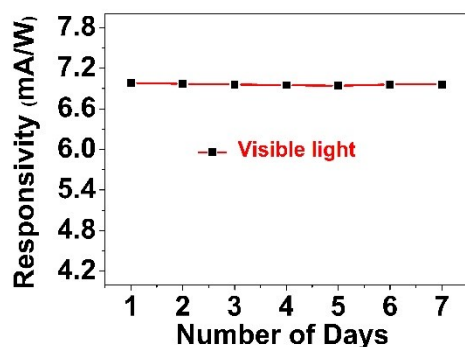

**Figure S1:** Graph showing the responsivity vs. number of days, indicating the stability of the device.

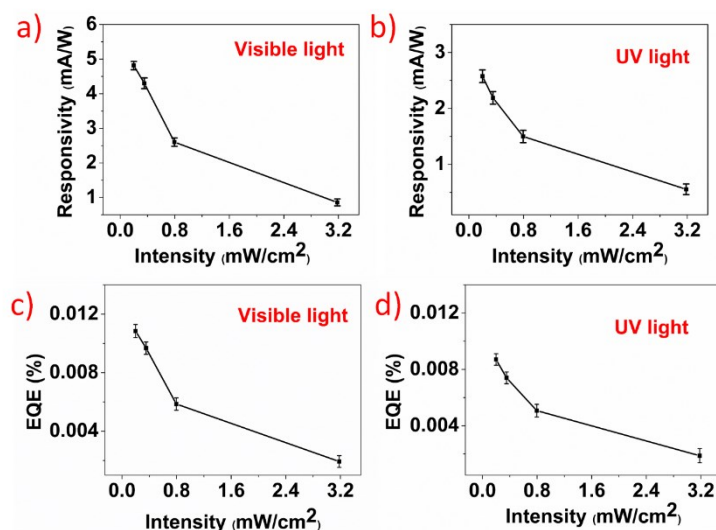

**Figure S2:** a, b) Responsivity v/s intensity under Visible and UV illumination, c,d) EQE v/s intensity under visible and visible illumination of SnS<sub>2</sub> grown on cellulose paper

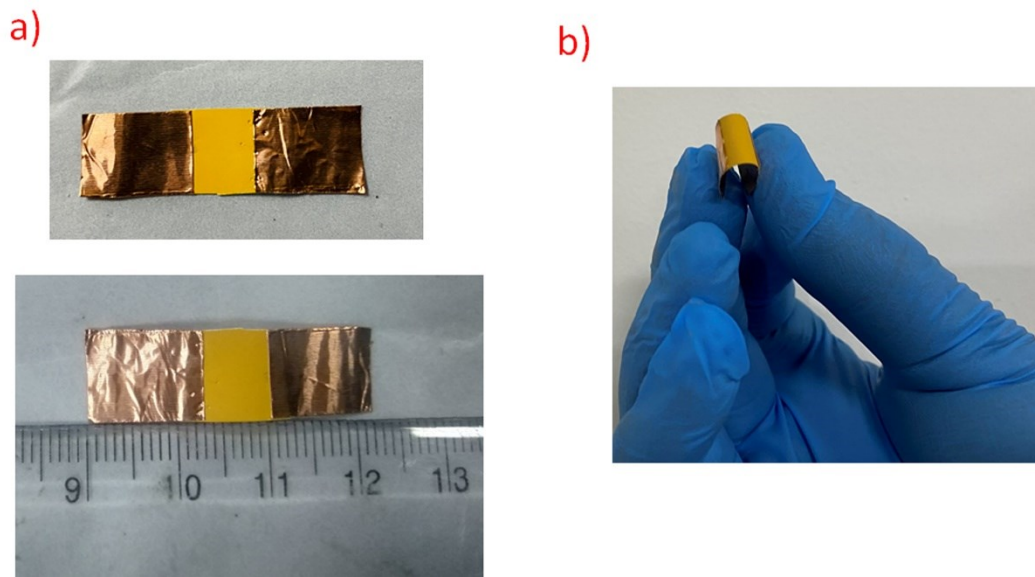

**Figure S3:** a) Digital image of the fabricated SnS<sub>2</sub>/Gr based device with an active area of 7 mm x 7 mm b) Digital image of the fabricated device in bending state.
